# Supplementary material for: Consumption of analgesics before a marathon and the incidence of cardiovascular, gastrointestinal and renal problems: a cohort study
Source: HighWire-hosted journal article supplement (doi:10.1136/bmjopen-2012-002090), 2013-01-01
Supplement: bmjopen-2012-002090supp_figure.pdf [file bmjopen-2012-002090supp_figure.pdf]

Figure S1: Questionnaire supplied to marathon/half marathon participants.

**Bonn Marathon – Questionnaire for all sportsmen (2010)**

Participant number ..... (voluntary) to avoid double registration; anonymity assured!

- 1) Sex  female /  male  
 2)  non-professional or  professional athlete  
 3) Age (years) ..... J  
 4) Do have marathon experience?  yes /  no  
 5) Running performance/week within the last 3 months approximately .....km  
 6) Did you experience joint, muscle, or back pain during or after training?  yes /  no  
 7) Do you have experience with analgesics in connection with sport?  yes /  no  
 8) Did you ingest analgesics before today's marathon, such as diclofenac, aspirin, ibuprofen, naproxen, acetaminophen, dipyryone?

1. Did you take analgesics before the start?  yes /  no  
 2. Did you have pain before the start of today's marathon?  yes /  no  
 3. Which analgesic and which dose did you take?

|                                         |                                            |                                        |
|-----------------------------------------|--------------------------------------------|----------------------------------------|
| <b>Ibuprofen</b><br>Please select... ▾  | <b>Diclofenac</b><br>Please select... ▾    | <b>Aspirin</b><br>Please select... ▾   |
| <b>Naproxen</b><br>Please select... ▾   | <b>Meloxicam</b><br>Please select... ▾     | <b>Celebrex</b><br>Please select... ▾  |
| <b>Etoricoxib</b><br>Please select... ▾ | <b>Acetaminophen</b><br>Please select... ▾ | <b>Dipyryone</b><br>Please select... ▾ |

Others: .....

4.  prescription or  OTC?  
 9) Do you use analgesic during training?  yes /  no  
 10) Did a physician check your laboratory values while preparing for the marathon (e.g. kidney lab values)?  yes /  no

11) Have you been informed about the risks of using analgesics in connection with a marathon?  yes /  no

- 12.) **In which race did you participate:**  
 a.  marathon,  half marathon,  relay (4 participants split the marathon distance)  
 b. Inline skating  full distance or  half distance  
 c. others: .....Km

- 13) **During the race:**  
 a. Hematuria  yes /  no  
 b. GI-cramps  yes /  no  
 c. GI-bleeds  yes /  no  
 d. CV-events (extrasystole, palpitation, tachycardia, and others)  yes /  no

- 14) **After the race:**  
 a. CV-events  yes /  no  
 b. Athralgia  yes /  no  
 c. Myalgia  yes /  no

- 15) **I withdrew from the race for the following reason(s):**  
 a.  I got tired of it  
 b.  I experienced severe pain  
 c.  I experienced GI-cramps  
 d.  I experienced muscle cramps  
 e.  other reasons: .....

Many thanks for your cooperation.  
 Dr. med. Michael Küster, Bonn, April 2010

Send / transfer data...
